# Supplementary material for: Precision-Cut Liver Slices as an ex vivo model to evaluate antifibrotic therapies for liver fibrosis and cirrhosis
Source: PubMed Central journal article supplement — bioRxiv. 2023 Nov 5:2023.10.30.564772. Preprint. [Version 2] doi: 10.1101/2023.10.30.564772 (PMC10635008; doi:10.1101/2023.10.30.564772), 2023-11-05

## **Legends for Supplementary Figures**

**Supplementary Figure 1. Schedule of PCLS preparation and erlotinib treatment.** Workflow of PCLS preparation and erlotinib treatment for (A) cirrhotic and (B) normal livers. (C) Summary table of PCLS preparation and erlotinib treatment.

## **Supplementary Figure 2. Viability evaluation in PCLS**

(A) Representative images of PCLS from CDAHFD-induced cirrhosis rats on MTS assays, the cells alive were stained with purple color. (B) Representative images of PCLS from DEN-induced cirrhosis rats on MTS viability assays. MTS assays in PCLS from (C) CDAHFD and (D) DEN-induced rat cirrhosis after erlotinib treatment. These experiments were repeated three times ( $n = 3$ ). All values were expressed as the mean  $\pm$  S.E.M with two-tailed Student's  $t$  tests.

## **Supplementary Figure 3. Improvement of PCLS processing.**

(A) Comparison of standard and modified protocols to proceed PCLS from TAA-induced rat cirrhosis.

## **Supplementary Figure 4. Confirmation of established murine cirrhosis.**

Confirmation of established (A) CDAHFD, (B) TAA, (C) DEN and (D) CCl<sub>4</sub>-induced murine cirrhosis.

## **Supplementary Figure 5. H&E staining.**

Representative images for H&E staining in PCLS from (A) CDAHFD-induced mouse cirrhosis, (B) TAA-induced rat cirrhosis, (C) DEN-induced *rat* cirrhosis, and (D) CCl<sub>4</sub>-induced *mouse* cirrhosis. (E) Representative images for H&E staining of PCLS from male healthy C57Bl/6 mice livers. (F) Representative images for H&E staining of human cirrhotic PCLS. Representative images for H&E staining of the samples from (G) *in vivo* DEN-induced rat cirrhotic models and (H) *in vivo* CCl<sub>4</sub>-induced mouse cirrhotic models.

**Supplementary Figure 6. Confirmation of established human cirrhosis.**

Confirmation of human established cirrhosis with (A) H&E and (B) Sirius red staining. (C) H&E and (D) Sirius red staining of PCLS from human established cirrhosis.

## Supplementary Tables

### Supplementary Table 1. Modified *Ishak* Scoring<sup>31</sup>

| Score    | Description                                                                                                                                                             |
|----------|-------------------------------------------------------------------------------------------------------------------------------------------------------------------------|
| <b>0</b> | No fibrosis                                                                                                                                                             |
| <b>1</b> | Fibrous expansion of some or most portal areas, with or without short fibrous septa                                                                                     |
| <b>2</b> | Fibrous expansion of most portal areas, with occasional portal to portal bridging, or with marked portal to portal bridging as well as portal areas to central bridging |
| <b>3</b> | Marked bridging with occasional nodules                                                                                                                                 |
| <b>4</b> | Probable to definite cirrhosis                                                                                                                                          |

### Supplementary Table 2. Oligonucleotides

| Gene Symbol   | Species Specificity | Company       | Assay ID      |
|---------------|---------------------|---------------|---------------|
| <i>18S</i>    | Human               | Thermo fisher | Hs03003631_g1 |
| <i>IL6</i>    | Human               | Thermo fisher | Hs00174131_m1 |
| <i>ACTA2</i>  | Human               | Thermo fisher | Hs00426835_g1 |
| <i>TIMP1</i>  | Human               | Thermo fisher | Hs01092512_g1 |
| <i>COL1A1</i> | Human               | Thermo fisher | Hs0016004_m1  |
| <i>TNFA</i>   | Human               | Thermo fisher | Hs00174128_m1 |
| <i>TGFBI</i>  | Human               | Thermo fisher | Hs00998133_m1 |
| <i>Il6</i>    | Rat                 | Thermo fisher | Rn01410330_m1 |
| <i>Acta2</i>  | Rat                 | Thermo fisher | Rn01759928_g1 |
| <i>Timpl</i>  | Rat                 | Thermo fisher | Rn01430873_g1 |
| <i>Colla1</i> | Rat                 | Thermo fisher | Rn01463848_m1 |
| <i>Tgfb1</i>  | Rat                 | Thermo fisher | Rn00572010_m1 |
| <i>Il6</i>    | Mouse               | Thermo fisher | Mm00446190_m1 |
| <i>Acta2</i>  | Mouse               | Thermo fisher | Mm00725412_s1 |
| <i>Timpl</i>  | Mouse               | Thermo fisher | Mm01341361_m1 |
| <i>Colla1</i> | Mouse               | Thermo fisher | Mm00801666_g1 |

|              |       |               |               |
|--------------|-------|---------------|---------------|
| <i>Tgfb1</i> | Mouse | Thermo fisher | Mm01178820_m1 |
| <i>Mmp2</i>  | Mouse | Thermo fisher | Mm00439498_m1 |
| <i>Mmp3</i>  | Mouse | Thermo fisher | Mm00440295_m1 |
| <i>Mmp8</i>  | Mouse | Thermo fisher | Mm00439509_m1 |
| <i>Mmp9</i>  | Mouse | Thermo fisher | Mm00442991_m1 |
| <i>Mmp13</i> | Mouse | Thermo fisher | Mm00439491_m1 |
| <i>Timp2</i> | Mouse | Thermo fisher | Mm00441825_m1 |

## Supplementary Figure 1

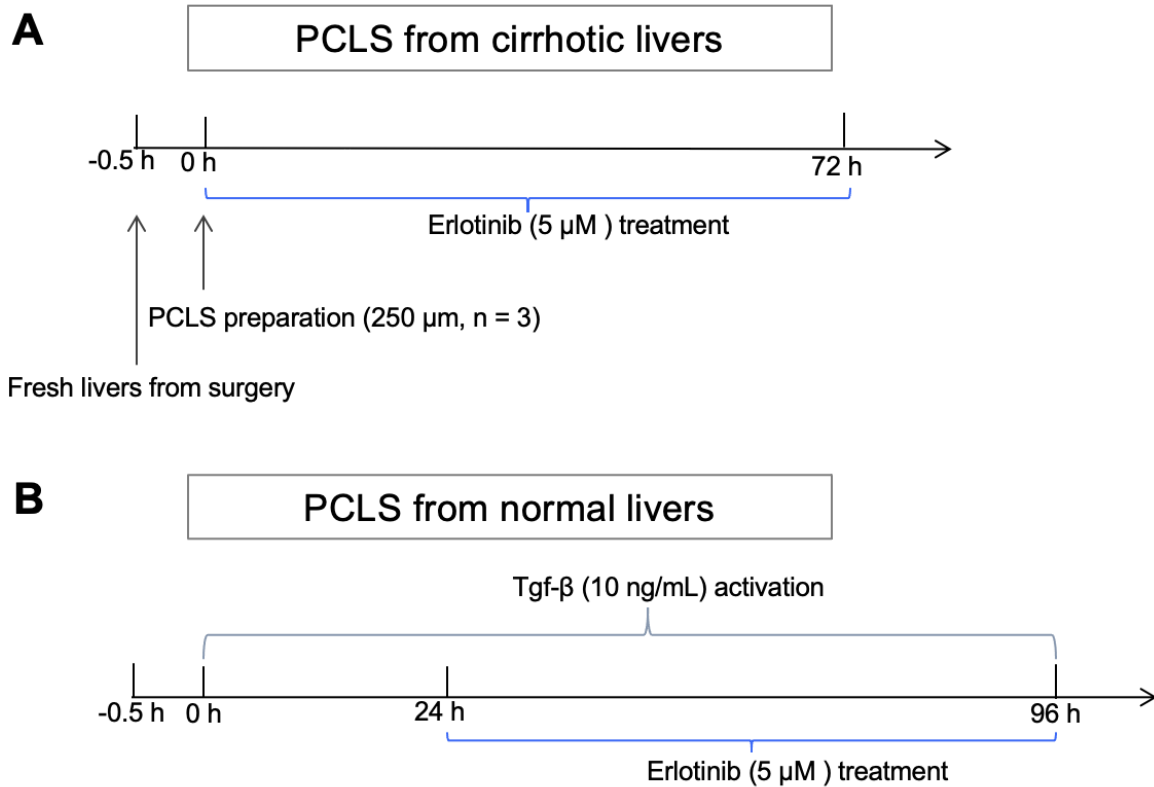

## C

| Model types                                        | Model induction                   | Erlotinib treatment |
|----------------------------------------------------|-----------------------------------|---------------------|
| <i>ex vivo</i> PCLS from 4 murine cirrhotic models | CDAHFD for 16 weeks               | 72 hours            |
|                                                    | 200 mg/kg TAA for 12 weeks        |                     |
|                                                    | 50 mg/kg DEN for 18 weeks         |                     |
|                                                    | 40% CCl <sub>4</sub> for 18 weeks |                     |
| <i>ex vivo</i> PCLS from murine normal livers      | Tgf- $\beta$ for 96 hours         | 72 hours            |
| <i>in vitro</i> human HSC (LX2, TWNT4)             |                                   |                     |
| <i>in vivo</i> murine cirrhotic models             | 50 mg/kg DEN for 18 weeks         | 10 weeks            |
|                                                    | 40% CCl <sub>4</sub> for 18 weeks | 6 weeks             |
| <i>ex vivo</i> PCLS from human cirrhotic liver     |                                   | 72 hours            |

## Supplementary Figure 2

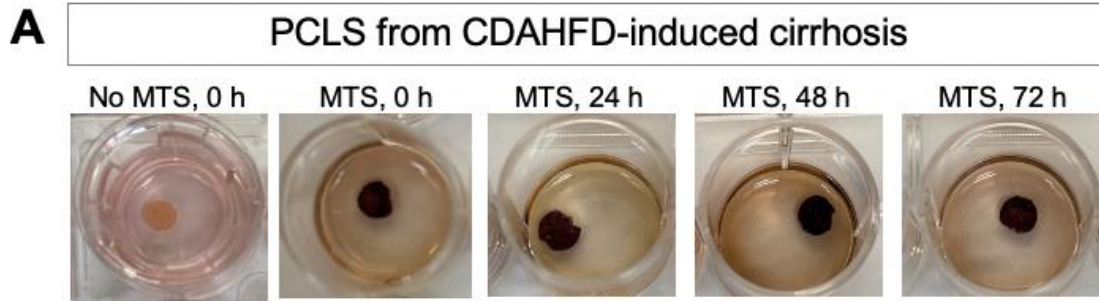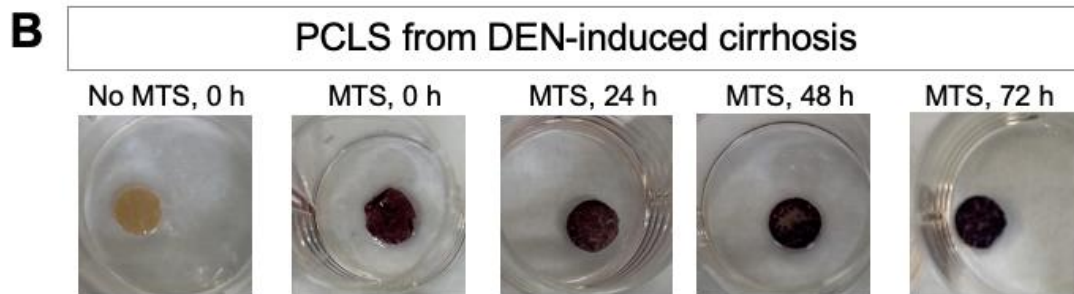

**C** PCLS from CDAHFD-induced cirrhosis

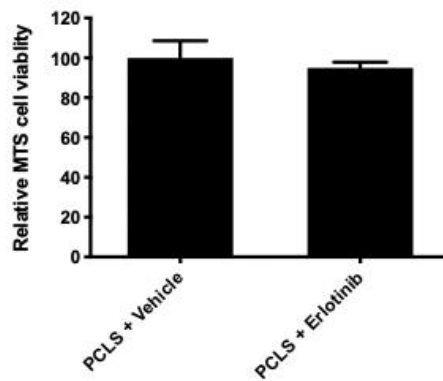

**D** PCLS from DEN-induced cirrhosis

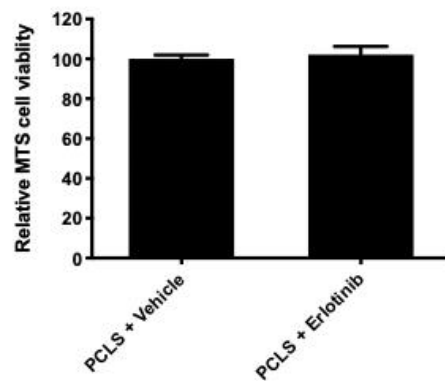

### Supplementary Figure 3

**A**

PCLS from TAA-induced cirrhosis

**Normal protocol**

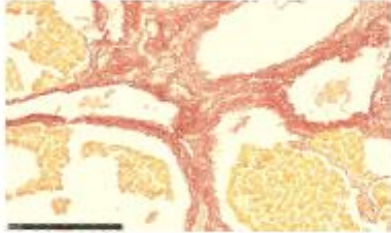

**Modified protocol**

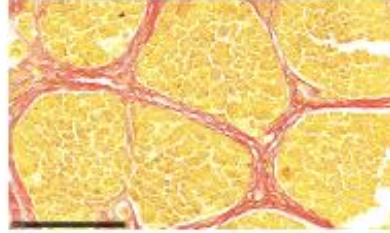

Supplementary Figure 4

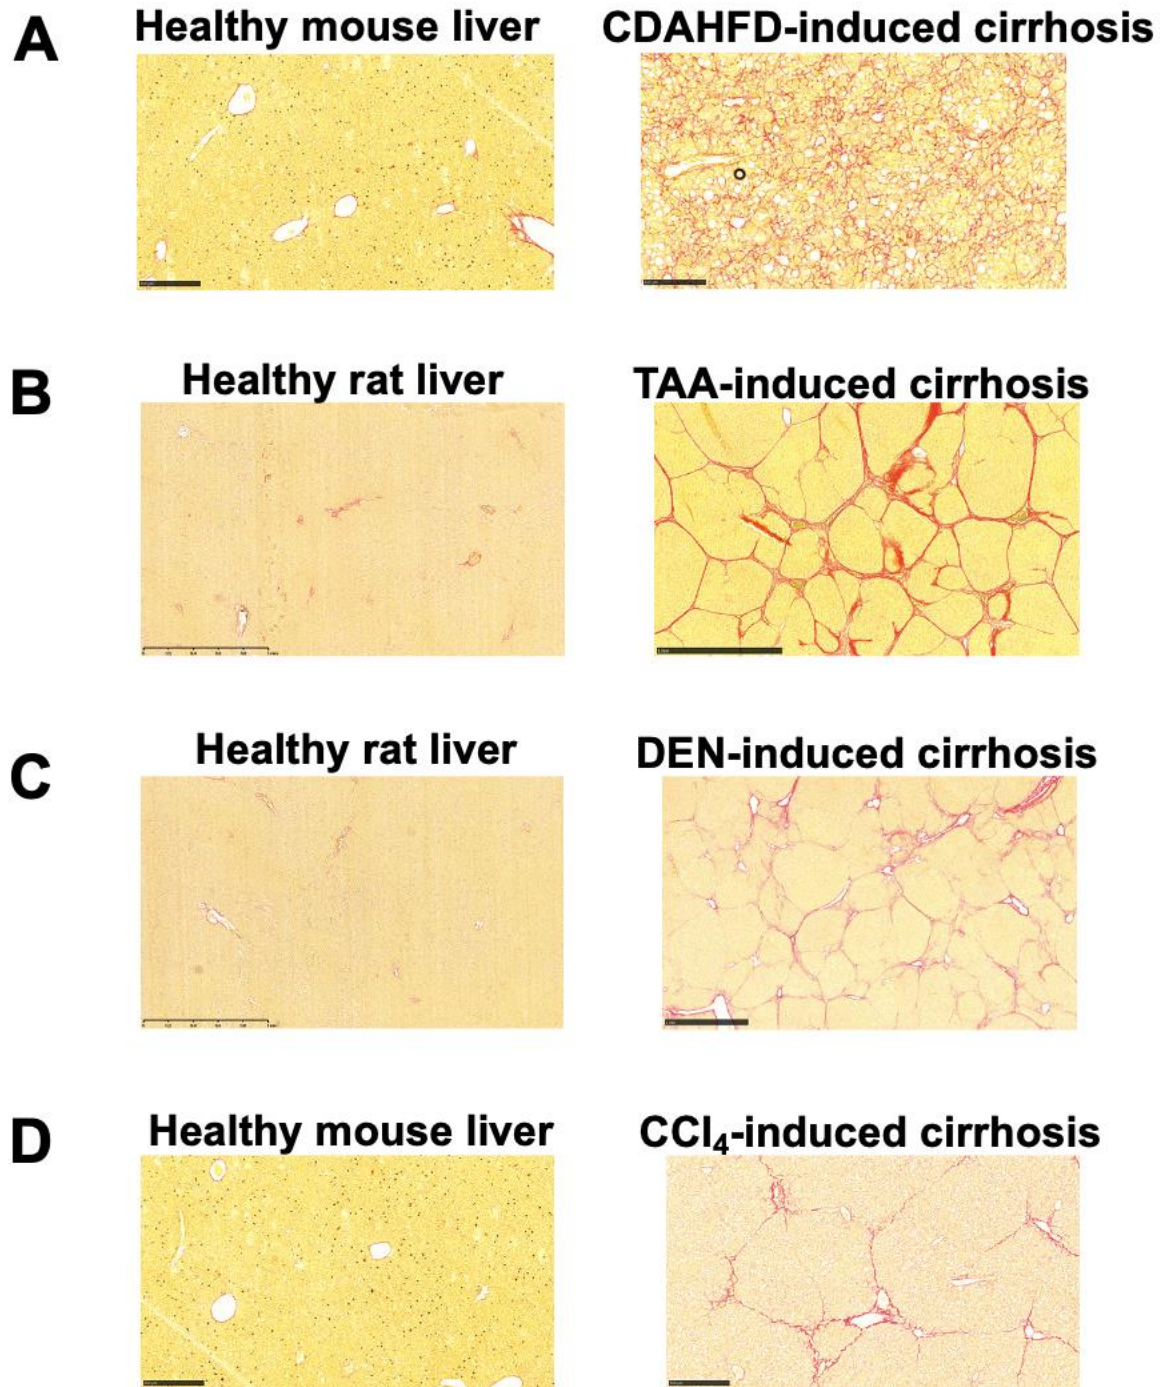



## Supplementary Figure 5

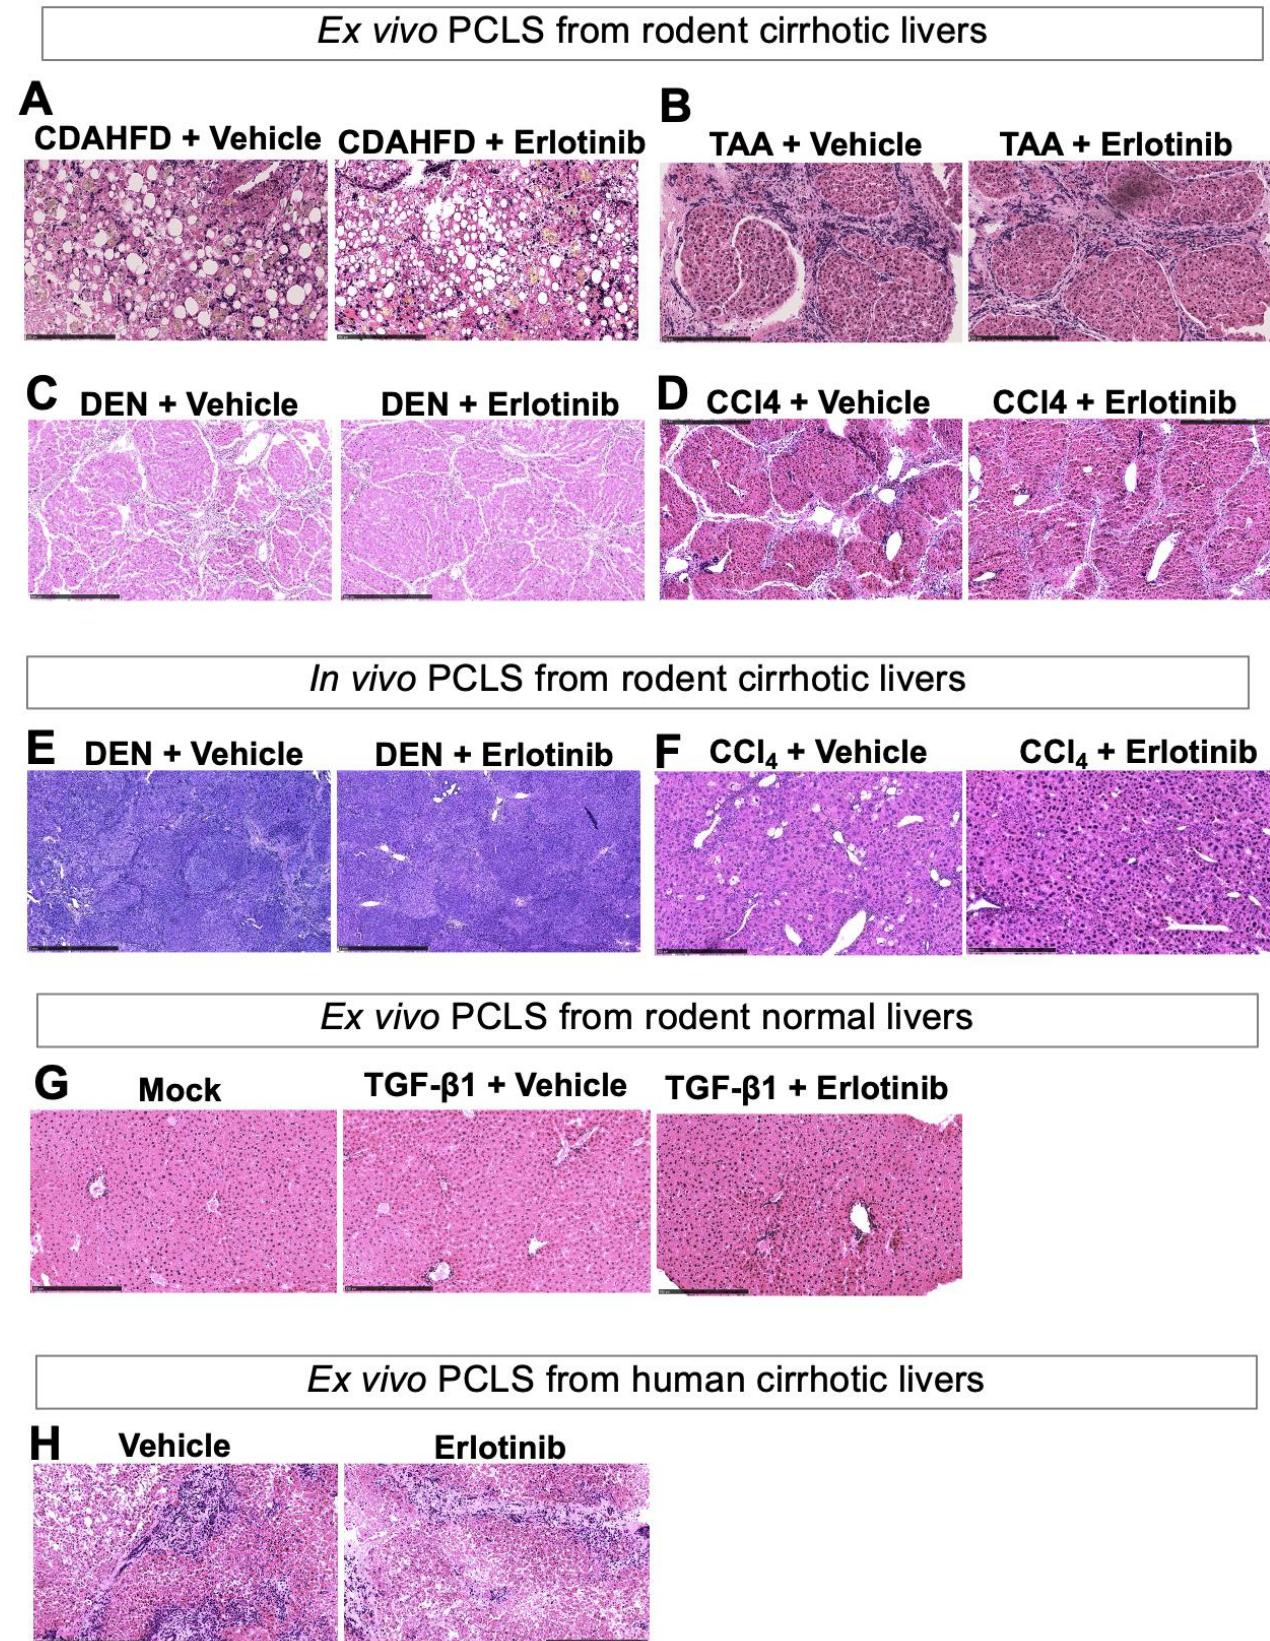

## Supplementary Figure 6

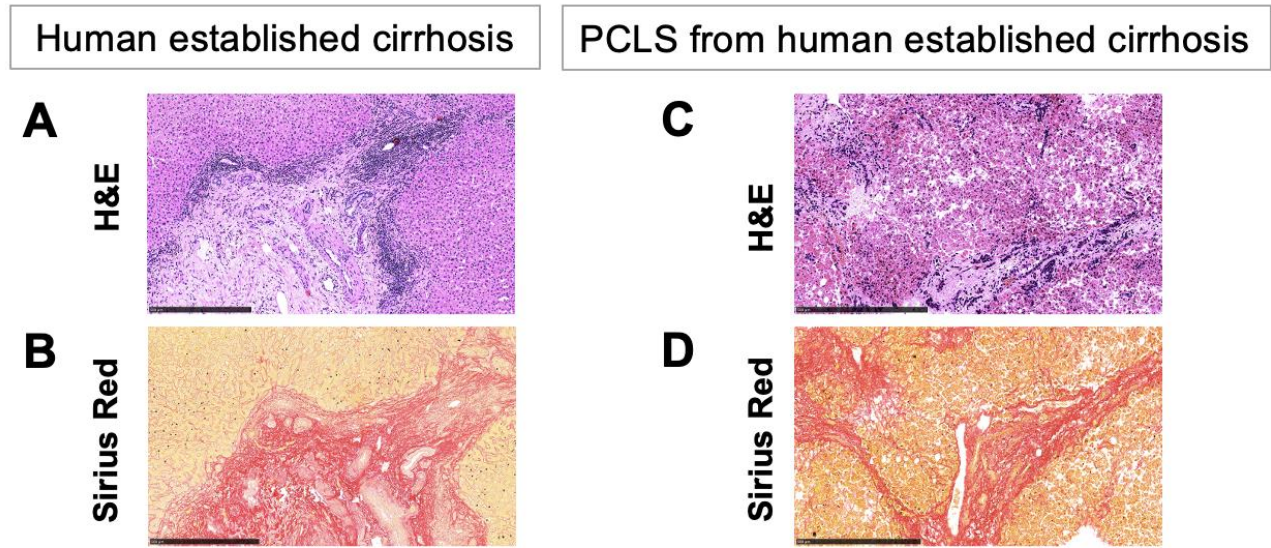

Supplement: NIHPP2023.10.30.564772v2-supplement-1.pdf [file NIHPP2023.10.30.564772v2-supplement-1.pdf]
